# Supplementary material for: Estimated glomerular filtration rate decline and risk of end-stage renal disease in type 2 diabetes
Source: PubMed Central journal article supplement (PMC6072050; doi:10.1371/journal.pone.0201535), 2018-08-02
Supplement: pone.0201535.s002.pdf [file pone.0201535.s002.pdf]

**S1 Table. Baseline characteristics according to percent changes in eGFR during the (a) 2-year or (b) 3-year baseline period.**

(a) 2-year baseline period (n=1868)

|                                                                    | Percent changes in eGFR |                      |                     |                     |
|--------------------------------------------------------------------|-------------------------|----------------------|---------------------|---------------------|
|                                                                    | ≤ -53%                  | ≤ -40%               | ≤ -30%              | ≤ -20%              |
| <b>N</b>                                                           | 70                      | 127                  | 207                 | 446                 |
| <b>ESRD events (n [%])</b>                                         | 48 (68.6)               | 68 (53.5)            | 80 (38.7)           | 99 (22.2)           |
| <b>Incidence rate of ESRD<br/>(per 1000 person-years [95%CI])</b>  | 139.1<br>(104.8–184.6)  | 99.4<br>(78.4–126.1) | 64.5<br>(51.8–80.3) | 32.0<br>(26.2–38.9) |
| <b>Death (n [%])</b>                                               | 4 (5.7)                 | 10 (7.9)             | 20 (9.7)            | 36 (8.1)            |
| <b>Incidence rate of death<br/>(per 1000 person-years [95%CI])</b> | 8.1<br>(6.9–9.7)        | 11.2<br>(6.0–20.9)   | 13.5<br>(8.7–20.9)  | 10.7<br>(7.7–14.9)  |
| <b>Age (years; mean [SD])</b>                                      | 55 (12.1)               | 58 (11.9)            | 59 (12.1)           | 60 (11.9)           |
| <b>Men (n [%])</b>                                                 | 42 (60.0)               | 80 (63.0)            | 124 (59.9)          | 246 (55.2)          |
| <b>UACR (mg/g; median [IQR])</b>                                   | 2378<br>(1230, 4019)    | 1731<br>(478, 3684)  | 825<br>(61, 2621)   | 90<br>(15, 1152)    |
| <b>eGFR (ml/min/1.73 m<sup>2</sup>; mean [SD])</b>                 | 58 (26.8)               | 61 (33.6)            | 68 (33.9)           | 76 (31.4)           |
| <b>Systolic BP (mmHg; mean [SD])</b>                               | 140 (22.7)              | 141 (21.7)           | 139 (21.7)          | 136 (21.0)          |
| <b>Diastolic BP (mmHg; mean [SD])</b>                              | 78 (13.4)               | 79 (12.9)            | 78.1 (12.1)         | 77 (12)             |
| <b>History of CVD (n [%])</b>                                      | 7 (8.6)                 | 14 (11.0)            | 22 (11.1)           | 56 (12.6)           |
| <b>HbA1c (%; mean [SD])</b>                                        | 8.6 (2.3)               | 8.5 (2.2)            | 8.5 (2.3)           | 8.5 (2.0)           |
| <b>Death (n [%])</b>                                               | 4 (5.7)                 | 10 (7.9)             | 20 (9.7)            | 36 (8.1)            |
| <b>Follow-up (years; mean [SD])</b>                                | 5.1 (2.4)               | 5.0 (2.2)            | 5.1 (2.2)           | 5.5 (2.6)           |

(b) 3-year baseline period (n=2001)

|                                                                    | Percent changes in eGFR |                     |                     |                     |
|--------------------------------------------------------------------|-------------------------|---------------------|---------------------|---------------------|
|                                                                    | ≤ -53%                  | ≤ -40%              | ≤ -30%              | ≤ -20%              |
| <b>N</b>                                                           | 79                      | 155                 | 281                 | 563                 |
| <b>ESRD events (n [%])</b>                                         | 46 (58.2)               | 60 (38.7)           | 75 (26.7)           | 92 (16.3)           |
| <b>Incidence rate of ESRD<br/>(per 1000 person-years [95%CI])</b>  | 100.7<br>(75.4–134.4)   | 61.5<br>(47.7–79.2) | 39.1<br>(31.2–49.0) | 22.1<br>(18.0–27.1) |
| <b>Death (n [%])</b>                                               | 10 (12.7)               | 23 (14.8)           | 32 (11.4)           | 51 (9.1)            |
| <b>Incidence rate of death<br/>(per 1000 person-years [95%CI])</b> | 25.6<br>(13.3–49.1)     | 24.7<br>(16.2–37.5) | 16.7<br>(11.7–23.7) | 12.1<br>(9.2–8.7)   |

|                                                    |                     |                   |                   |                 |
|----------------------------------------------------|---------------------|-------------------|-------------------|-----------------|
| <b>Age (years; mean [SD])</b>                      | 57 (12.0)           | 58 (12.7)         | 60 (12.2)         | 60 (11.5)       |
| <b>Men (n [%])</b>                                 | 52 (65.8)           | 90 (58.1)         | 161 (57.3)        | 315 (56.0)      |
| <b>UACR (mg/g; median [IQR])</b>                   | 1925<br>(478, 3329) | 758<br>(63, 2378) | 226<br>(25, 1446) | 55<br>(14, 598) |
| <b>eGFR (mL/min/1.73 m<sup>2</sup>; mean [SD])</b> | 58 (26.2)           | 69 (33.5)         | 73 (31.4)         | 78 (29.7)       |
| <b>Systolic BP (mmHg; mean [SD])</b>               | 139 (21.6)          | 139 (20.7)        | 137 (20.8)        | 135 (20.6)      |
| <b>Diastolic BP (mmHg; mean [SD])</b>              | 80 (11.3)           | 78 (11.6)         | 77 (11.2)         | 76 (11.5)       |
| <b>History of CVD (n [%])</b>                      | 9 (11.4)            | 18 (11.6)         | 33 (11.7)         | 70 (12.4)       |
| <b>HbA1c (%; mean [SD])</b>                        | 8.4 (2.1)           | 8.5 (2.1)         | 8.4 (2.0)         | 8.4 (2.0)       |
| <b>Follow-up (years; mean [SD])</b>                | 4.2 (1.8)           | 4.2 (1.7)         | 4.4 (2.1)         | 4.7 (2.5)       |

ESRD, end-stage renal disease; CI, Confidence interval; UACR, urine albumin-to-creatinine ratio; eGFR, estimated glomerular filtration rate; BP, blood pressure; CVD, cardiovascular disease; SD, standard deviation; IQR, interquartile range.
