# Supplementary material for: Estimated glomerular filtration rate decline and risk of end-stage renal disease in type 2 diabetes
Source: PubMed Central journal article supplement (PMC6072050; doi:10.1371/journal.pone.0201535), 2018-08-02
Supplement: pone.0201535.s003.pdf [file pone.0201535.s003.pdf]

**S2 Table. Adjusted hazard ratios of end-stage renal disease according to percent changes in eGFR during the 2-year or 3-year baseline period referred to no change in eGFR.**

|                               | Percent changes in eGFR  |                     |                  |                 |                 |
|-------------------------------|--------------------------|---------------------|------------------|-----------------|-----------------|
|                               | -53%                     | -40%                | -30%             | -20%            | 0%<br>Reference |
| <b>2-year baseline period</b> |                          |                     |                  |                 |                 |
| <b>All participants</b>       | 22.9 (11.1–47.3)         | 12.8 (6.9–23.7)     | 8.2 (4.3–15.5)   | 3.9 (2.2–7.0)   | 1               |
| <b>Macroalbuminuria</b>       | 8.2 (3.2–20.9)           | 5.3 (2.2–12.8)      | 3.8 (1.5–9.5)    | 2.4 (1.0–5.5)   | 1               |
| <b>Microalbuminuria</b>       | 10.4 (1.0–108.0)         | 4.6 (0.8–27.9)      | 3.1 (0.7–13.4)   | 2.2 (0.6–8.2)   | 1               |
| <b>Normoalbuminuria</b>       | 2245.5 (16.8–299867.1)   | 78.9 (3.0–2060.4)   | 3.4 (0.2–75.1)   | 0.5 (0.04–6.2)  | 1               |
| <b>3-year baseline period</b> |                          |                     |                  |                 |                 |
| <b>All participants</b>       | 29.7 (10.8–81.9)         | 18.4 (7.6–44.7)     | 12.8 (5.2–32.2)  | 5.4 (2.3–12.8)  | 1               |
| <b>Macroalbuminuria</b>       | 5.1 (1.5–17.0)           | 4.4 (1.4–13.7)      | 3.9 (1.2–12.8)   | 1.9 (0.7–5.4)   | 1               |
| <b>Microalbuminuria</b>       | 107.7 (5.1–2254.4)       | 30.2 (1.8–498.1)    | 9.5 (0.5–164.0)  | 6.5 (0.4–110.1) | 1               |
| <b>Normoalbuminuria</b>       | 10956.6 (14.5–8299862.5) | 329.9 (4.8–22462.8) | 17.8 (0.7–450.2) | 2.2 (0.1–34.1)  | 1               |

eGFR, estimated glomerular
