# Supplementary material for: Estimated glomerular filtration rate decline and risk of end-stage renal disease in type 2 diabetes
Source: PubMed Central journal article supplement (PMC6072050; doi:10.1371/journal.pone.0201535), 2018-08-02
Supplement: pone.0201535.s004.pdf [file pone.0201535.s004.pdf]

**S3 Table. Multivariate Cox proportional hazards models of risk factors for end-stage renal disease in the 2-year or 3-year baseline analysis.**

|                                        | 2-year baseline analysis |         | 3-year baseline analysis |         |
|----------------------------------------|--------------------------|---------|--------------------------|---------|
|                                        | Hazard ratio             | P value | Hazard ratio             | P value |
| <b>Percent changes in eGFR (%)</b>     |                          |         |                          |         |
| > 0                                    | 1                        |         | 1                        |         |
| > -30, ≤ 0                             | 2.67 (1.13–6.29)         | 0.03    | 4.49 (1.07–18.78)        | 0.04    |
| > -53, ≤ -30                           | 13.73 (5.35–35.22)       | <0.01   | 18.56 (4.24–81.15)       | <0.01   |
| ≤ -53                                  | 28.27 (10.79–74.06)      | <0.01   | 47.38 (10.43–215.22)     | <0.01   |
| <b>Baseline characteristics</b>        |                          |         |                          |         |
| Age (+10 years)                        | 0.63 (0.52–0.77)         | <0.01   | 0.69 (0.56–0.86)         | <0.01   |
| Men (vs. Women)                        | 1.55 (1.04–2.30)         | 0.03    | 1.41 (0.90–2.20)         | 0.14    |
| UACR (+10 mg/g)                        | 1.00 (1.00–1.00)         | <0.01   | 1.00 (1.00–1.00)         | <0.01   |
| eGFR (-10 mL/min/1.73 m <sup>2</sup> ) | 1.56 (1.41–1.73)         | <0.01   | 1.43 (1.29–1.59)         | <0.01   |
| Systolic BP (+10 mmHg)                 | 1.18 (1.08–1.28)         | <0.01   | 1.19 (1.07–1.31)         | <0.01   |
| HbA1c (+1.0 %)                         | 1.26 (1.14–1.39)         | <0.01   | 1.26 (1.13–1.40)         | <0.01   |

Abbreviations: eGFR, estimated glomerular filtration rate; UACR, urine albumin-to-creatinine ratio; BP, blood pressure.
