# Supplementary material for: Estimated glomerular filtration rate decline and risk of end-stage renal disease in type 2 diabetes
Source: PubMed Central journal article supplement (PMC6072050; doi:10.1371/journal.pone.0201535), 2018-08-02
Supplement: pone.0201535.s005.pdf [file pone.0201535.s005.pdf]

**S4 Table. Adjusted hazard ratios of all-cause mortality according to percent changes in eGFR during the 2-year or 3-year baseline period referred to no change in eGFR.**

|                               | Percent changes in eGFR |               |               |               |                   |
|-------------------------------|-------------------------|---------------|---------------|---------------|-------------------|
|                               | -53%                    | -40%          | -30%          | -20%          | 0%<br>(Reference) |
| <b>2-year baseline period</b> | 2.7 (1.1–6.8)           | 2.0 (1.2–3.6) | 1.6 (1.0–2.7) | 1.2 (0.9–1.8) | 1                 |
| <b>3-year baseline period</b> | 5.2 (2.6–10.3)          | 2.6 (1.6–4.1) | 1.5 (0.9–2.5) | 1.0 (0.7–1.5) | 1                 |

eGFR, estimated glomerular filtration rate
